# Supplementary material for: Coming to Consensus: What Defines Deep Partial Thickness Burn Injuries in Porcine Models?
Source: PubMed Central journal article supplement — J Burn Care Res. 2020 Aug 24;42(1):98–109. doi: 10.1093/jbcr/iraa132 (PMC7856457; doi:10.1093/jbcr/iraa132), 2020-08-24
Supplement: iraa132_suppl_supplementary_appendix_a.pdf [file iraa132_suppl_supplementary_appendix_a.pdf]

Sample ID: \_\_\_\_\_

Reviewer: \_\_\_\_\_

Date: \_\_\_\_\_

| Question                                                                                                                                                                                                                                                                                                                                                                       | Yes | No  | Comments (Indicate all that apply from A, B, C, D from column 1) | Score/Intensity of Damage: Circle One                                                                                                                                                                        |
|--------------------------------------------------------------------------------------------------------------------------------------------------------------------------------------------------------------------------------------------------------------------------------------------------------------------------------------------------------------------------------|-----|-----|------------------------------------------------------------------|--------------------------------------------------------------------------------------------------------------------------------------------------------------------------------------------------------------|
| 1. Do you find the section to be of high enough quality to evaluate?<br>A. Air bubbles                      C. Fold or tears<br>B. Uneven staining                  D. Obvious artifact                                                                                                                                                                                        |     |     |                                                                  | N/A                                                                                                                                                                                                          |
| 2. Do you perceive there to be thermal damage in this section?                                                                                                                                                                                                                                                                                                                 |     |     |                                                                  | N/A                                                                                                                                                                                                          |
| 3. Can you observe any thermal damage to the epidermis?<br><br>Damage can be defined as:<br>A. elongated string bean nuclei<br>B. loss of staining intensity                                                                                                                                                                                                                   |     |     |                                                                  | 0: Normal<br>1: Flattening of dermal-epidermal junction (DE)<br>2: Flattening and disruption of DE junction<br>3: Epidermis lost adherence                                                                   |
| 4. Can you observe any thermal damage to the dermis?                                                                                                                                                                                                                                                                                                                           |     |     |                                                                  | N/A                                                                                                                                                                                                          |
| 5. Split the sample up into quarters from superficial to deep. What level does the damage extend to?<br><br>Damage can be defined as:<br>A. Swollen or fragmented cells<br>B. Blocked blood vessels tightly packed with RBCs (vascular congestion/ occlusion)<br>C. Elongated string bean nuclei<br>D. Collagen fibers are thin, flattened, or absent and can contain fissures | N/A | N/A |                                                                  | 0: 0%: Normal, uninjured<br>1: 1-25%<br>2: 25-50%<br>3: 50-75%<br>4: 75-99%<br>5: 100%: full thickness (entire dermis damaged)                                                                               |
| 6. Intensity of damage at the level of the deepest dermal damage (i.e. if categorized extent of damage as 3: 50-75% (Question 4) what is intensity of damage?)                                                                                                                                                                                                                 | N/A | N/A |                                                                  | 1: minimal (1 characteristic from column 4)<br>2: mild (2 characteristics)<br>3: moderate (3 characteristics)<br>4: severe/marked (4 characteristics)                                                        |
| 7. Is there an inflammatory infiltrate?<br><br>Can be defined as infiltration of:<br>A. Neutrophils<br>B. Eosinophils<br>C. Macrophages<br>D. Lymphocyte infiltration                                                                                                                                                                                                          |     |     |                                                                  | 0: None<br>1: minimal (<25% of cells are inflammatory)<br>2: mild (<25-50% of cells are inflammatory)<br>3: moderate (50-75% of cells are inflammatory)<br>4: severe/marked (>75% of cells are inflammatory) |
| 8. Is there a hair follicle present in the section that is acceptable to characterize?<br><br>If present, is the bulb of the hair follicle for assessment located:<br>A. Superficial dermal<br>B. Mid dermal<br>C. Deep dermal<br>D. Hypodermis                                                                                                                                |     |     |                                                                  |                                                                                                                                                                                                              |
| 9. Is there damage to the base of the hair follicle?<br><br>Defined as:<br>A. Vacuolization<br>B. lacy effect of epidermal cells at base of hair follicle bulb                                                                                                                                                                                                                 |     |     |                                                                  | 0: None<br>1: minimal < 25%<br>2: mild (< 50%)<br>3: moderate (>50%)<br>4: severe/marked (100% of shaft and bulb is affected)                                                                                |
